# Supplementary material for: Neuroblastoma Tumor-Associated Mesenchymal Stromal Cells Regulate the Cytolytic Functions of NK Cells
Source: MDPI journal article supplement (doi:10.3390/cancers15010019), 2022-12-20
Supplement: s1 [file s1]

# Supplementary Figure S1.

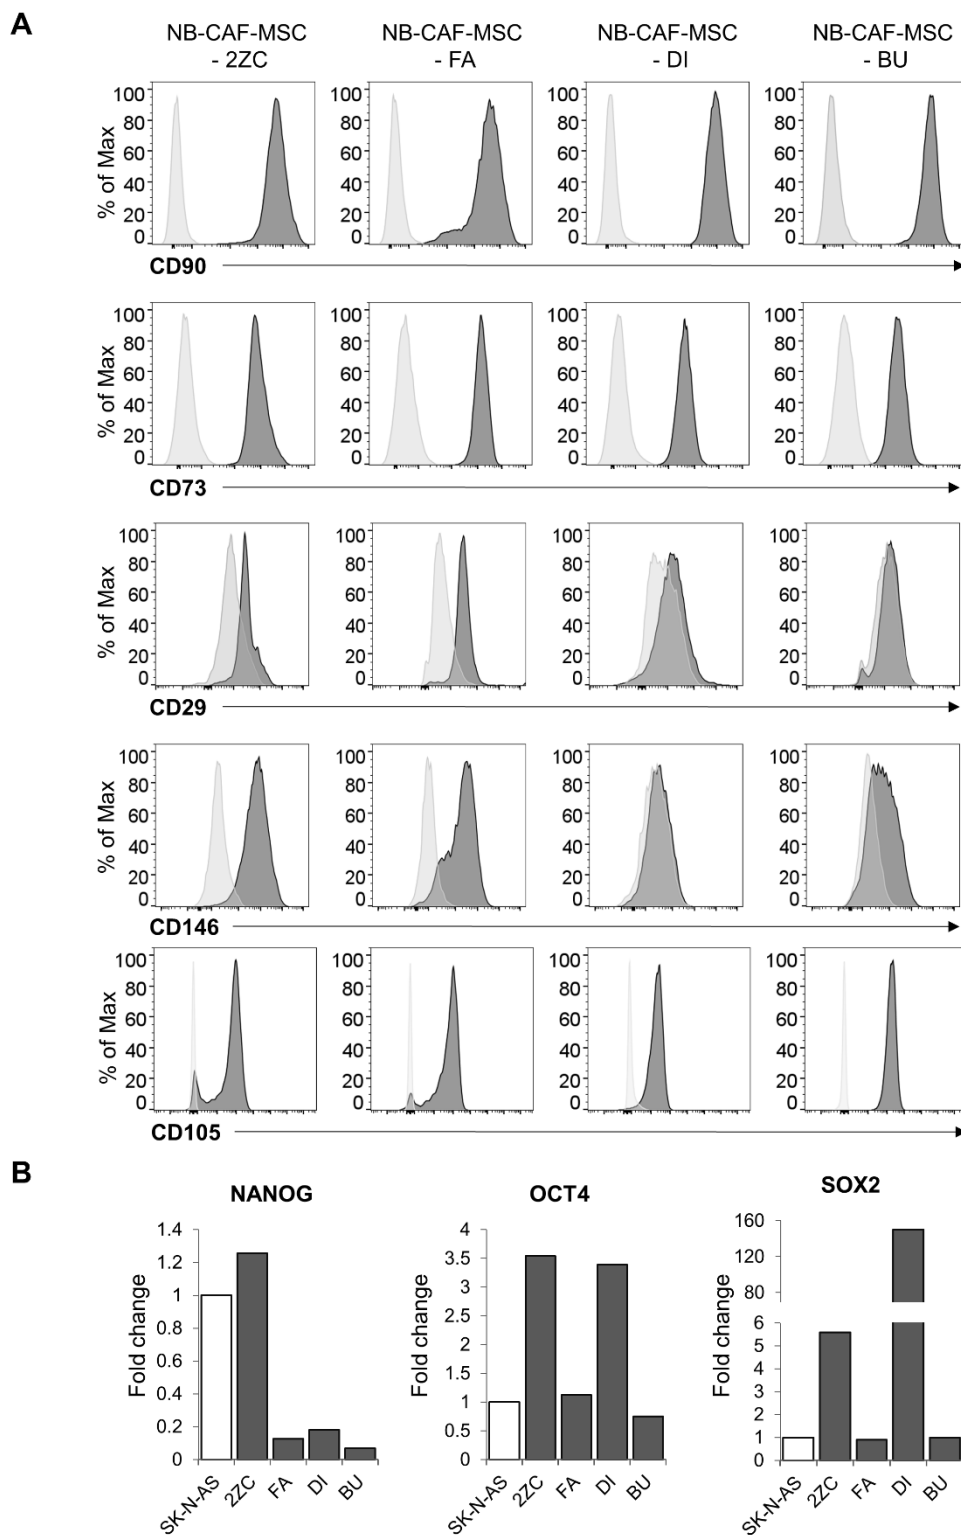

**Supplementary Figure S1.** Evaluation of the Mesenchymal phenotype in primary NB-TA-MSC cultures. **(A)** Flow-cytometry analysis of the indicated surface markers (CD105, CD90, CD73, CD29 and CD146). Light grey histograms represent unstained control; dark grey histograms represent stained samples. A representative experiment is shown of  $n = 5$  experiments performed. **(B)** RT-qPCR analysis

of SOX2, NANOG and OCT4 stemness genes transcript in different primary NB-TA-MSC cultures. The NB commercial cell line SK-N-AS was used as reference control. Histograms represent the fold change of gene transcript expression normalized for GAPDH expression compared to SK-N-AS expression which level is arbitrarily set as 1. Data are expressed as mean  $\pm$  SD ( $n = 3$ ).

**Supplementary Figure S2.**

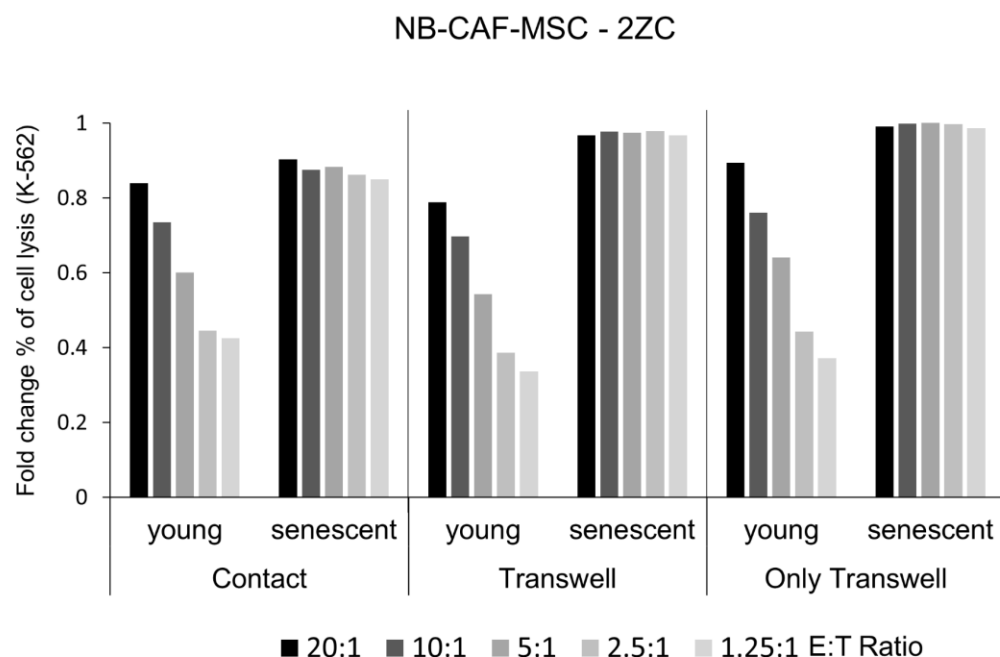

**Supplementary Figure S2.** Senescent NB-CAF-MSC – 2ZC lose their immunomodulatory properties in comparison to the young cells. Percentage of K-562 cells lysis in cytotoxicity assays using freshly isolated NK cells after co-culture with young and senescent NB-CAF-MSC – 2ZC primary cultures under direct cell-cell contact or under Transwell conditions. Data presented here are expressed as fold change of percentage of cell lysis vs CTRL.
